# Supplementary material
Source: PubMed Central journal article supplement (PMC2824172)

**Supplementary Figure S1**

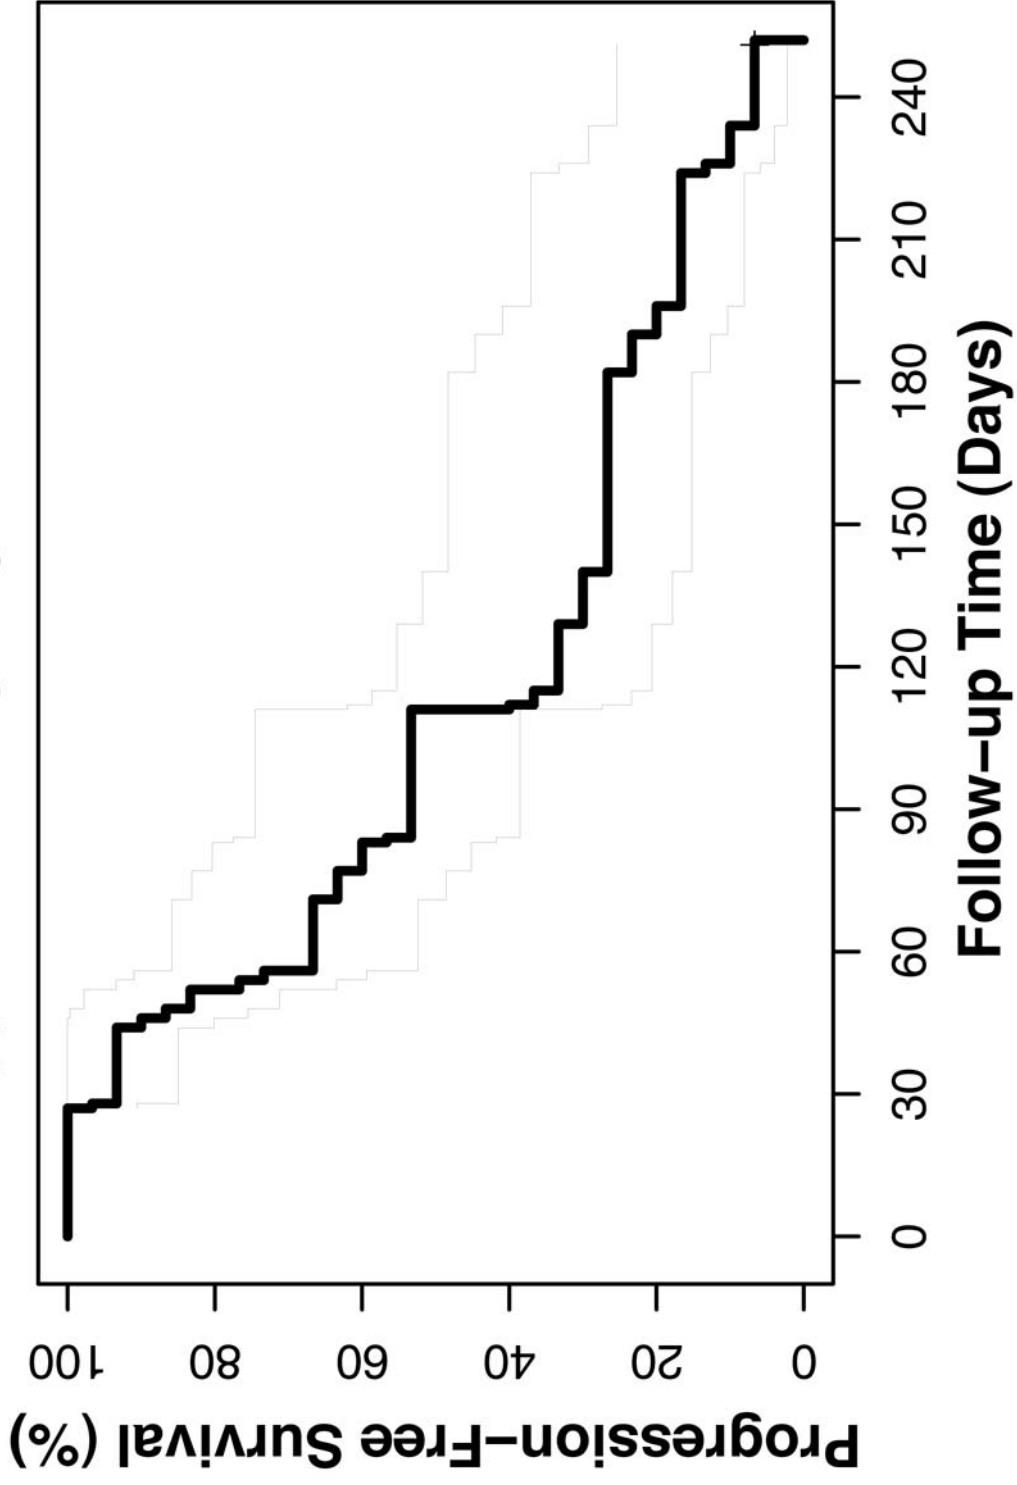

**Supplementary Figure S2**

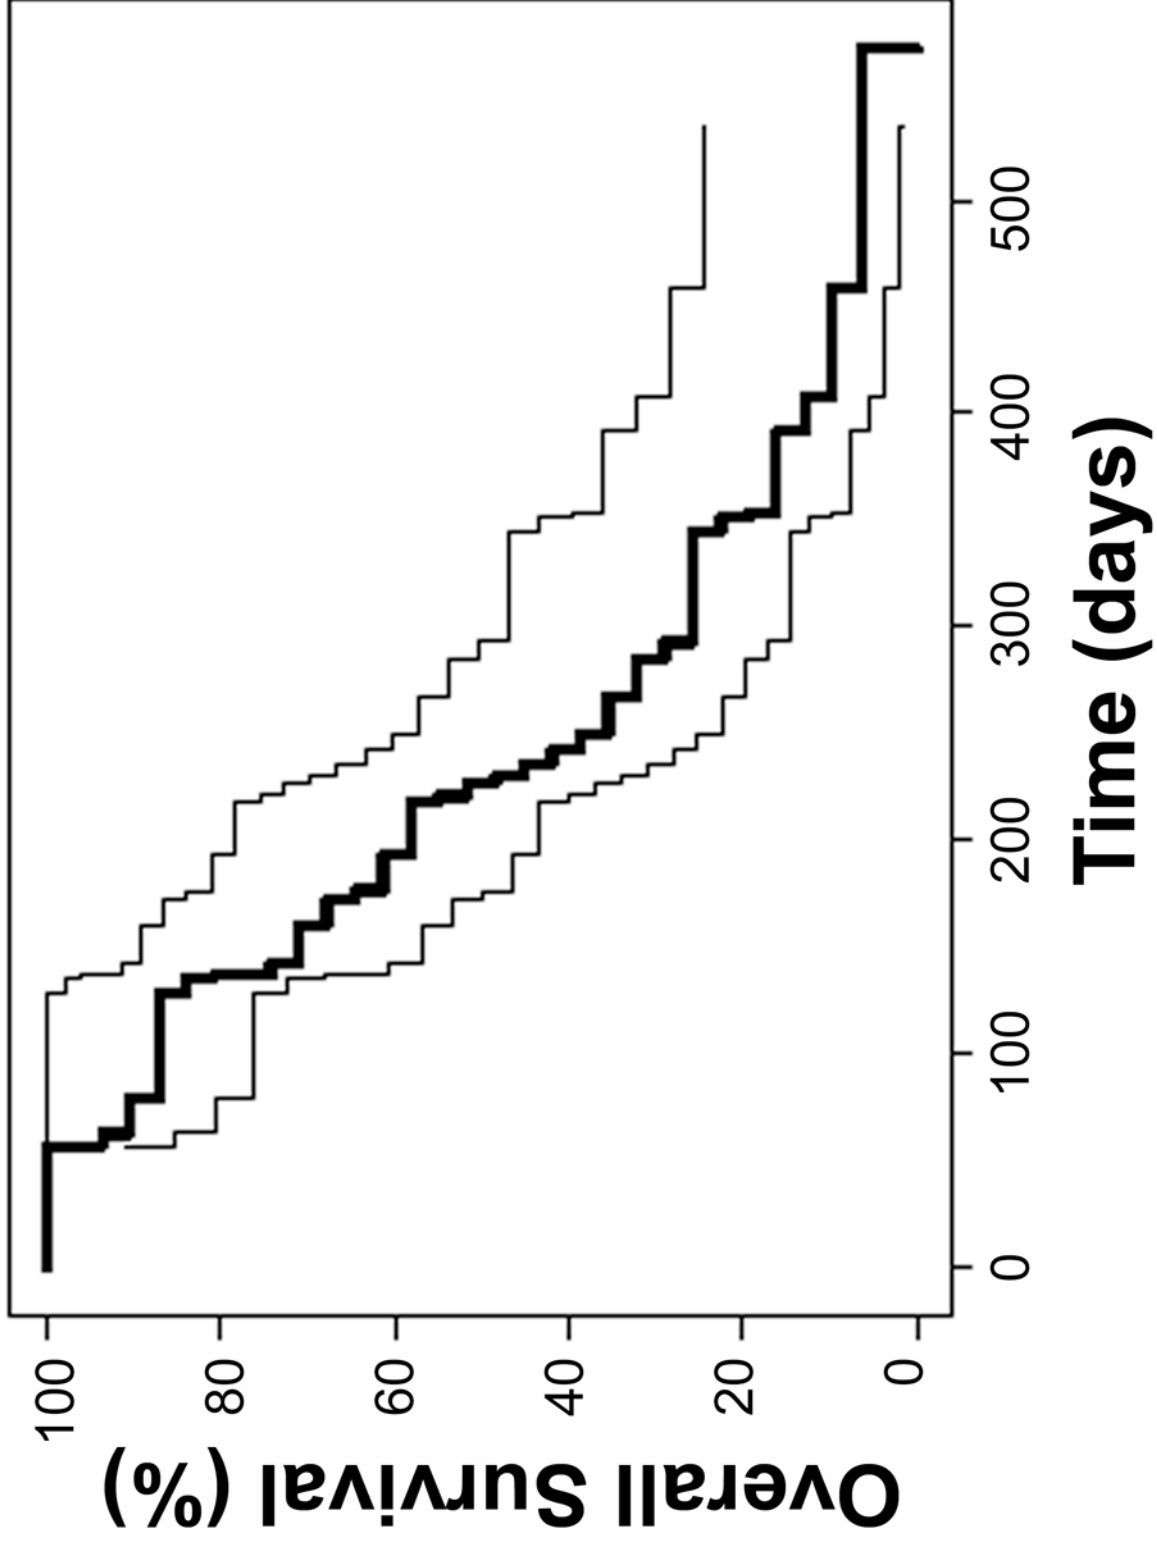

# Supplementary Figure S3

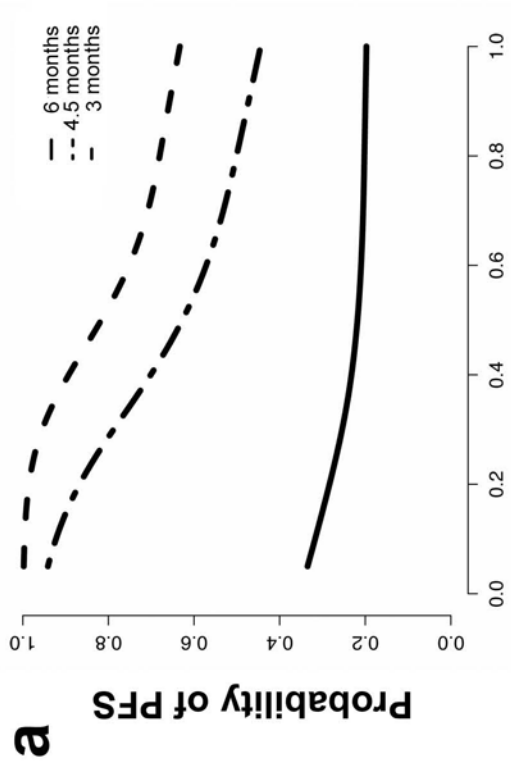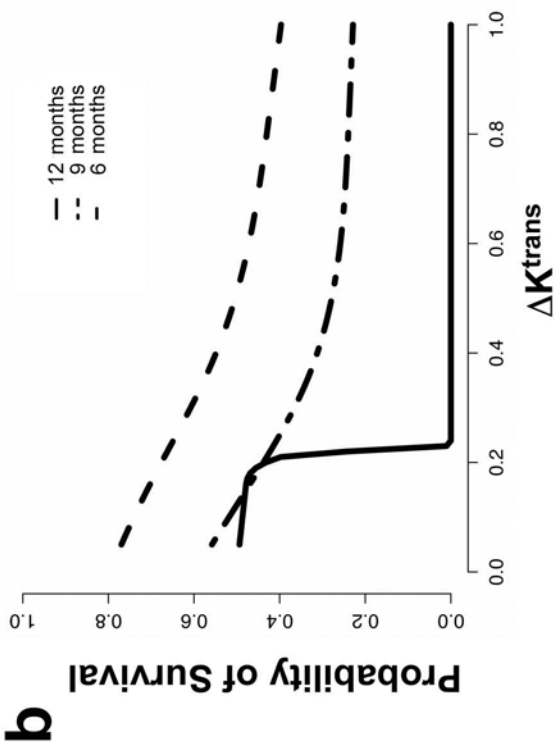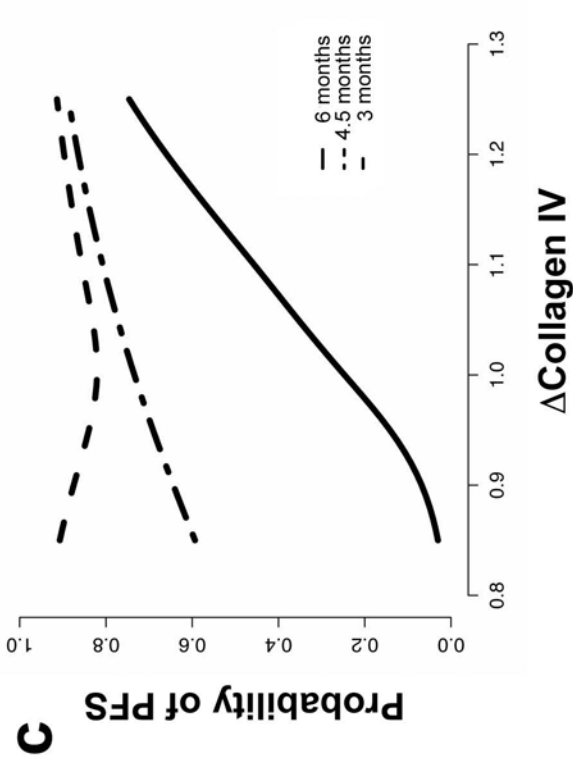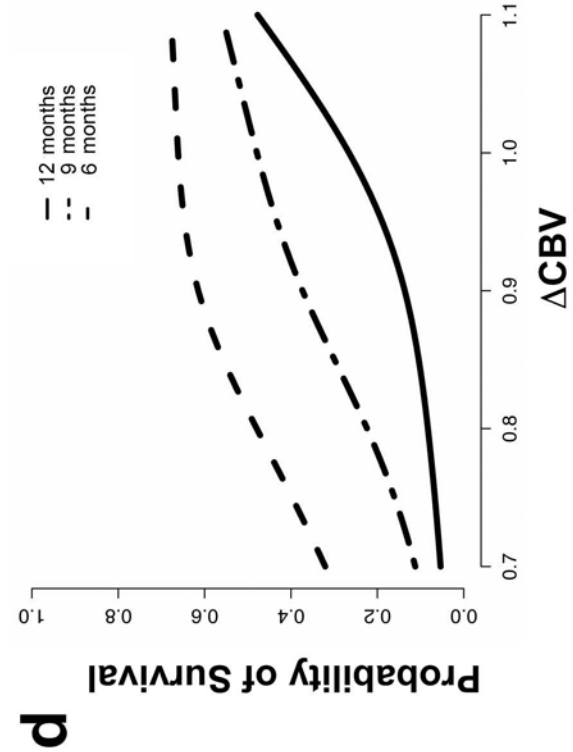

# Supplementary Figure S4

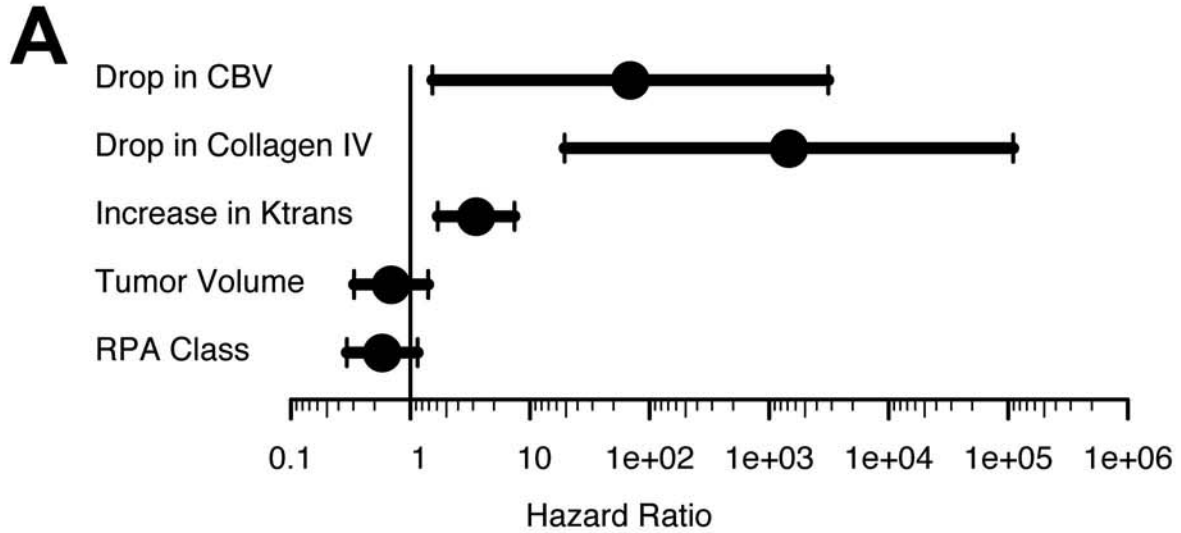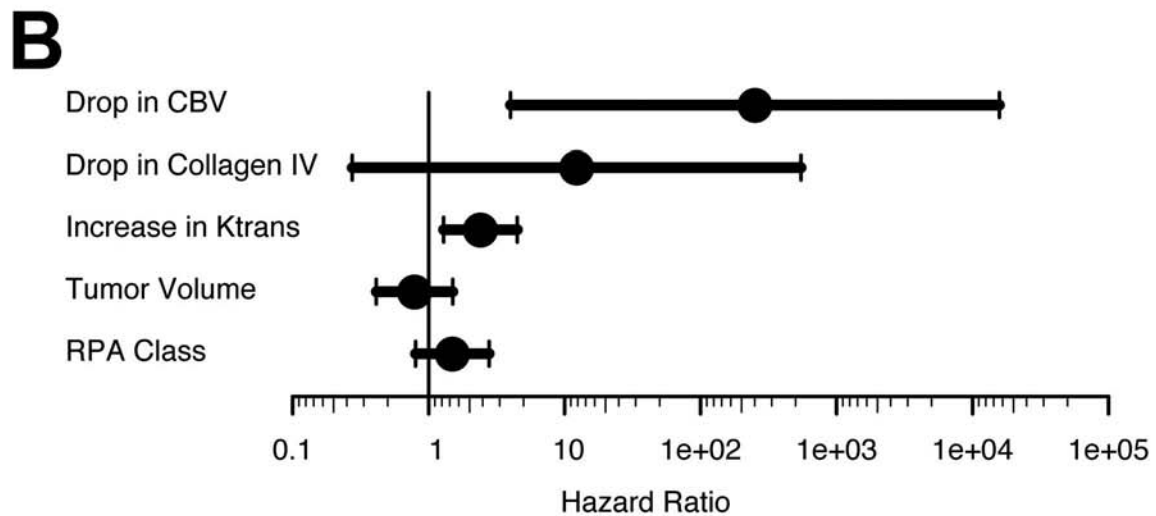

Supplement: NIHMS175391-supplement-Supplementary_Figures.pdf [file NIHMS175391-supplement-Supplementary_Figures.pdf]
