# Supplementary material
Source: PubMed Central journal article supplement (PMC2824172)
Supplement: NIHMS175391-supplement-Supplementary_Tables.pdf [file NIHMS175391-supplement-Supplementary_Tables.pdf]

**Supplementary Table S1: Kinetics of imaging and plasma biomarkers (pg/ml) – that are mechanistically related to tumor vascular normalization – after cediranib treatment in the recurrent GBM patients.** Data are shown as medians and interquartile ranges (in square brackets) measured pre-treatment (Pre-Tx) and 1 day post-treatment.

| Biomarker                                  | Pre-Tx                        | Day 1                        |
|--------------------------------------------|-------------------------------|------------------------------|
| <b>K<sup>trans</sup> (MRI)<sup>1</sup></b> | 0.095* [0.062 – 0.155] (N=30) | 0.033 [0.017 – 0.044] (N=29) |
| P-value <sup>2</sup>                       | N/A                           | <0.0001                      |
| <b>CBV small vessels (MRI)</b>             | 0.7* [0.5 – 0.8] (N=30)       | 0.6 [0.5 – 0.7] (N=29)       |
| P-value                                    | N/A                           | <0.0001                      |
| <b>Vessel caliber (MRI)</b>                | 7.29 [6.15 – 7.95] (N=30)     | 6.64 [5.80 – 7.56] (N=30)    |
| P-value                                    | N/A                           | 0.0098                       |
| <b>ADC (MRI)</b>                           | 1287 [1218 – 1406] (N=30)     | 1289 [1206 – 1361] (N=30)    |
| P-value                                    | N/A                           | <0.0001                      |
| <b>FLAIR (MRI)</b>                         | 126 [96 – 162] (N=30)         | 144 [93 – 170] (N=30)        |
| P-value                                    | N/A                           | 0.90                         |
| <b>v<sub>e</sub> (MRI)</b>                 | 0.095 [0.042 – 0.209] (N=29)  | 0.054 [0.030 – 0.110] (N=27) |
| P-value                                    | N/A                           | 0.06                         |
| <b>Plasma Ang1 (ELISA)</b>                 | 2658 [1496,4674] (N=28)       | 1778 [1298,6359] (N=28)      |
| P-value                                    | N/A                           | 0.92                         |
| <b>Plasma Ang2 (ELISA)</b>                 | 1532 [1229,1858] (N=31)       | 1485 [1161, 1923] (N=31)     |
| P-value                                    | N/A                           | 0.23                         |
| <b>Plasma MMP-2 (ELISA)</b>                | 1378 [855,1937] (N=25)        | 1157 [809,1507] (N=25)       |
| P-value                                    | N/A                           | 0.0020                       |
| <b>Plasma Collagen IV (ELISA)</b>          | 0.17 [0.16 – 0.18] (N=30)     | 0.16 [0.13 – 0.17] (N=30)    |
| P-value                                    | N/A                           | 0.0041                       |

<sup>1</sup>Double baseline MRI scans were performed and reported previously in a subset of patients (Batchelor et al, Cancer Cell 2007). The mean K<sup>trans</sup> on the other baseline was 0.098 and the mean CBV on the other baseline was 0.68, indicating good reproducibility.

<sup>2</sup>P-values are from the paired exact Wilcoxon test.

**Supplementary Table S2: Multivariable models of association between log-transformed changes at day 1 after cediranib treatment in  $K^{trans}$ , collagen IV, and microvascular CBV with radiographic progression of disease and mortality in patients with recurrent GBM.** Data are shown as hazard ratios with 95% confidence intervals (in square brackets).

| Biomarker      | Progression                          | Mortality                         |
|----------------|--------------------------------------|-----------------------------------|
| log(Ktrans.ch) | 2.5 [1.4,4.4]<br>P=0.0015            | 2.3 [1.3,4.0]<br>P=0.0039         |
| log(CollIV.ch) | 0.00077 [0.000011,0.056]<br>P=0.0010 | 0.14 [0.0033,6.2]<br>P=0.3115     |
| log(CBV.ch)    | 0.073 [0.0024,2.2]<br>P=0.1326       | 0.0071 [0.00021,0.23]<br>P=0.0056 |

Abbreviations: log(ktrans.ch): ratio of day 1 to baseline  $K^{trans}$  (log-transformed); log(coliv.ch): ratio of day 1 to baseline Collagen IV (log-transformed); log(cbvs.ch): ratio of day 1 to baseline cerebral blood volume (log-transformed).

**Supplementary Table S3: Multivariable models of association between RPA class, log-transformed baseline CE-T1 volume, and changes at day 1 after cediranib treatment in  $K^{trans}$ , collagen IV, and microvascular CBV with radiographic progression of disease and mortality in patients with recurrent GBM.** Data are shown as hazard ratios with 95% confidence intervals (in square brackets).

| Biomarker             | Progression                         | Mortality                          |
|-----------------------|-------------------------------------|------------------------------------|
| RPA                   | 0.58 [0.29,1.1]<br>P=0.1179         | 1.5 [0.80,2.8]<br>P=0.2067         |
| CE-T1v                | 0.69 [0.34,1.4]<br>P=0.3056         | 0.79 [0.41,1.5]<br>P=0.4689        |
| log( $K^{trans}$ .ch) | 3.5 [1.7,7.4]<br>P=0.0008           | 2.4 [1.3,4.5]<br>P=0.0059          |
| log(CollIV.ch)        | 0.00068 [0.0000091,0.051]<br>0.0009 | 0.082 [0.0018,3.6]<br>P=0.1962     |
| log(CBV.ch)           | 0.014 [0.00032,0.66]<br>P=0.0295    | 0.0040 [0.000063,0.25]<br>P=0.0089 |

Abbreviations: RPA: recursive partitioning analysis; log(CE-T1v) enhancing tumor volume at baseline (log-transformed); log( $k^{trans}$ .ch): ratio of day 1 to baseline  $K^{trans}$  (log-transformed); log(colliv.ch): ratio of day 1 to baseline Collagen IV (log-transformed); log(cbvs.ch): ratio of day 1 to baseline cerebral blood volume (log-transformed).

**Supplementary Table S4: The residual deviance table for six-month progression-free survival of disease for three parameters**

|                | Df | Deviance Resid. | Df | Resid. Dev | P(> Chi ) |
|----------------|----|-----------------|----|------------|-----------|
| NULL           |    |                 | 28 | 134.393    |           |
| log(ktrans.ch) | 1  | 6.855           | 27 | 127.538    | 0.009     |
| log(coliv.ch)  | 1  | 9.347           | 26 | 118.191    | 0.002     |
| log(cbvs.ch)   | 1  | 2.193           | 25 | 115.998    | 0.139     |

Abbreviations: Df: degrees of freedom (associated with added variable, and of the model, respectively); Deviance Resid: deviance residual contributed by the added variable; Resid. Dev: residual deviance of the model or partial log likelihood; P(>|Chi|): P-value from the likelihood ratio test; NULL: model with no covariates; log(ktrans.ch): ratio of day 1 to baseline Ktrans (log-transformed); log(coliv.ch): ratio of day 1 to baseline Collagen IV (log-transformed); log(cbvs.ch): ratio of day 1 to baseline cerebral blood volume (log-transformed).

**Supplementary Table S5: The residual deviance table for overall survival for three parameters**

|                | Df | Deviance Resid. | Df | Resid. Dev | P(> Chi ) |
|----------------|----|-----------------|----|------------|-----------|
| NULL           |    |                 | 28 | 134.393    |           |
| log(ktrans.ch) | 1  | 6.142           | 27 | 128.251    | 0.013     |
| log(coliv.ch)  | 1  | 0.002           | 26 | 128.249    | 0.961     |
| log(cbvs.ch)   | 1  | 7.137           | 25 | 121.112    | 0.008     |

Abbreviations: Df: degrees of freedom (associated with added variable, and of the model, respectively); Deviance Resid: deviance residual contributed by the added variable; Resid. Dev: residual deviance of the model or partial log likelihood; P(>|Chi|): P-value from the likelihood ratio test; NULL: model with no covariates; log(ktrans.ch): ratio of day 1 to baseline Ktrans (log-transformed); log(coliv.ch): ratio of day 1 to baseline Collagen IV (log-transformed); log(cbvs.ch): ratio of day 1 to baseline cerebral blood volume (log-transformed).

**Supplementary Table S6: The residual deviance table for six-month progression-free survival for five parameters**

|                | Df | Deviance Resid. | Df | Resid. Dev | P(> Chi ) |
|----------------|----|-----------------|----|------------|-----------|
| NULL           |    |                 | 28 | 134.393    |           |
| RPA class      | 1  | 0.987           | 27 | 133.407    | 0.321     |
| log(CE-T1v)    | 1  | 0.209           | 26 | 133.198    | 0.648     |
| log(ktrans.ch) | 1  | 8.030           | 25 | 125.168    | 0.005     |
| log(coliv.ch)  | 1  | 8.156           | 24 | 117.011    | 0.004     |
| log(cbvs.ch)   | 1  | 4.546           | 23 | 112.466    | 0.033     |

Abbreviations: Df: degrees of freedom (associated with added variable, and of the model, respectively); Deviance Resid: deviance residual contributed by the added variable; Resid. Dev: residual deviance of the model or partial log likelihood; P(>|Chi|): P-value from the likelihood ratio test; NULL: model with no covariates; RPA: recursive partitioning analysis; log(CE-T1v): enhancing tumor volume at baseline (log-transformed); log(ktrans.ch): ratio of day 1 to baseline  $K^{trans}$  (log-transformed); log(coliv.ch): ratio of day 1 to baseline Collagen IV (log-transformed); log(cbvs.ch): ratio of day 1 to baseline cerebral blood volume (log-transformed).

**Supplementary Table S7: The residual deviance table for overall survival for five parameters**

|                | Df | Deviance Resid. | Df | Resid. Dev | P(> Chi ) |
|----------------|----|-----------------|----|------------|-----------|
| NULL           |    |                 | 28 | 134.393    |           |
| RPA class      | 1  | 0.987           | 27 | 133.406    | 0.159     |
| log(CE-T1v)    | 1  | 0.209           | 26 | 131.544    | 0.353     |
| log(ktrans.ch) | 1  | 6.142           | 27 | 125.914    | 0.018     |
| log(coliv.ch)  | 1  | 0.002           | 26 | 125.574    | 0.560     |
| log(cbvs.ch)   | 1  | 7.137           | 25 | 119.027    | 0.011     |

Abbreviations: Df: degrees of freedom (associated with added variable, and of the model, respectively); Deviance Resid: deviance residual contributed by the added variable; Resid. Dev: residual deviance of the model or partial log likelihood; P(>|Chi|): P-value from the likelihood ratio test; NULL: model with no covariates; RPA: recursive partitioning analysis; log(CE-T1v): enhancing tumor volume at baseline (log-transformed); log(ktrans.ch): ratio of day 1 to baseline  $K^{trans}$  (log-transformed); log(coliv.ch): ratio of day 1 to baseline Collagen IV (log-transformed); log(cbvs.ch): ratio of day 1 to baseline cerebral blood volume (log-transformed).

## Supplementary Figure Legend

**Supplementary Figure S1:** Kaplan-Meier estimate of the progression-free survival function after cediranib treatment in recurrent glioblastoma patients (n=31). The figures show regression lines with 95% predictive confidence intervals.

**Supplementary Figure S2:** Kaplan-Meier estimate of the overall survival function after cediranib treatment in recurrent glioblastoma patients (n=31). The figures show regression lines with 95% predictive confidence intervals.

**Supplementary Figure S3: Univariate analyses for correlation between parameters related to vascular normalization and survival outcomes.** The ratio of  $K^{\text{trans}}$  values measured at day 1 and baseline are significantly correlated with progression-free survival (PFS) at 3, 4.5, and 6 months (**a**) and overall survival (OS) at 6, 9, and 12 months (**b**) after treatment onset. The extent of circulating collagen IV change at day 1 is significantly correlated with PFS at 3, 4.5, and 6 months (**c**), and the extent of microvessel CBV change at day 1 is significantly correlated with OS at 6, 9, and 12 months (**d**).

**Supplementary Figure S4:** Plots depicting association (hazard ratios with 95% confidence intervals obtained in a multivariable Cox regression) between changes in  $K^{\text{trans}}$ , CBV, collagen IV, CE-T1 tumor enhancement volume and RPA (recursive partitioning analysis) class and survival outcomes. (**a**) Correlations with progression-free survival (PFS) at six months. (**b**) Correlations with overall survival OS at one year.
